# Supplementary material
Source: PubMed Central journal article supplement (PMC6867193)
Supplement: ehp-127-107013-s002.pdf [file ehp-127-107013-s002.pdf]

**Note to readers with disabilities:** *EHP* strives to ensure that all journal content is accessible to all readers. However, some figures and Supplemental Material published in *EHP* articles may not conform to [508 standards](#) due to the complexity of the information being presented. If you need assistance accessing journal content, please contact [ehp508@niehs.nih.gov](mailto:ehp508@niehs.nih.gov). Our staff will work with you to assess and meet your accessibility needs within 3 working days.

### **Supplemental Material**

#### **Exposure to Bisphenol A and Bisphenol S and Incident Type 2 Diabetes: A Case–Cohort Study in the French Cohort D.E.S.I.R.**

Fanny Rancière, Jérémie Botton, Rémy Slama, Marlène Z. Lacroix, Laurent Debrauwer, Marie Aline Charles, Ronan Roussel, Beverley Balkau, Dianna J. Magliano, and the D.E.S.I.R. Study Group

#### **Table of Contents**

**Table S1.** Baseline characteristics of D.E.S.I.R. individuals included and not included in the random subcohort after applying exclusion criteria.

**Table S2.** Adjusted associations between exposure to BPA and BPS and the risk of type 2 diabetes in the D.E.S.I.R. cohort (models including both BPA and BPS).

**Table S3.** Adjusted associations between average BPA exposure and average BPS detection and the risk of type 2 diabetes among men and women in the D.E.S.I.R. cohort.

**Table S4.** Adjusted associations between average BPS detection and the risk of type 2 diabetes according to baseline BMI in the D.E.S.I.R. cohort.

**Figure S1.** Flow chart of the case-cohort study nested in the French prospective cohort study D.E.S.I.R. when considering exposure at year 3 in relation to incident T2D.

**Figure S2.** Relationship between log-transformed BPA-G concentration at baseline and adjusted hazard ratio (HR) of type 2 diabetes in the D.E.S.I.R. case-cohort study fitted with restricted cubic splines (three knots placed at the 10th, 50th and 90th percentiles).
